# Supplementary material for: Transcriptional Alterations Related to Neuropathology and Clinical Manifestation of Alzheimer’s Disease
Source: PLOS journal article supplement (doi:10.1371/journal.pone.0048751), 2012-11-07
Supplement: S5 (10.1371/journal.pone.0048751.s005) [file journal.pone.0048751.s005]

**Table S4. Biological process categories overrepresented by the genes related to interaction network.**

| <b>Biological processes</b>                        | <b>Genes</b>                                                                                             | <b>P-Value</b> |
|----------------------------------------------------|----------------------------------------------------------------------------------------------------------|----------------|
| signal transduction                                | GNA13, DNM2, EGFR, ERBB3, ERG, GRN, ATM, PECAM1, PIK3CB, PLAUR, PRKCE, MAP2K1, PXN, STAT3, STK24, IKBKAP | 0.00161        |
| apoptosis                                          | EP300, PPP1R15A, KPNB1, SMAD3, MLL, BCL2, TIAM1, STK24, DNAJA3, ITM2B                                    | 0.02360        |
| transcription, DNA-dependent                       | ELF3, ETS2, SMAD3, MLL, MYC, RB1, RELB, STAT3, CBL                                                       | 0.01040        |
| nerve growth factor receptor signaling pathway     | CHUK, PIK3CB, PRKCE, MAP2K1, SHC1, BRAF, STAT3, TIAM1                                                    | 0.00068        |
| epidermal growth factor receptor signaling pathway | EGFR, GAB1, MAP2K1, PTPN11, PXN, SHC1, CBL                                                               | 0.00002        |
| cytokine-mediated signaling pathway                | CCR1, IL6ST, PLP2, PTPN11, STAT3, DNAJA3                                                                 | 0.00126        |
| cell-cell adhesion                                 | EGFR, ITGB1, PIK3CB, BCL2, SHC1                                                                          | 0.00539        |
| positive regulation of MAP kinase activity         | EGFR, PIK3CB, MAP2K1, SHC1                                                                               | 0.01200        |
| neuron apoptosis                                   | ERBB3, ATM, RB1, BCL2                                                                                    | 0.00010        |
| response to DNA damage stimulus                    | PPP1R15A, ATM, BCL2                                                                                      | 0.03670        |
| response to oxidative stress                       | KRT1, MAP2K1, BCL2                                                                                       | 0.03670        |
| neuron differentiation                             | MAP2K1, RB1, SHC1                                                                                        | 0.01220        |

Biological process categories significantly overrepresented by significant genes and their connectors from the interaction network ( $P < 0.05$ , Fisher's exact test). Other similar significant categories are not included to reduce redundancy.
